# Supplementary material for: Etiologies of Acute Bronchiolitis in Children at Risk for Asthma, with Emphasis on the Human Rhinovirus Genotyping Protocol
Source: MDPI journal article supplement (doi:10.3390/jcm12123909), 2023-06-08
Supplement: s1 [file s1]

**TABLE S1. Primers used for amplification and sequencing of HRV region.**

| Region               | Primer | Polarity  | Position               | Primer Length | Sequence (5'-3')              | Reference |
|----------------------|--------|-----------|------------------------|---------------|-------------------------------|-----------|
| VP3-VP1-2A           | 92378  | Sense     | 2060-2084 <sup>a</sup> | 25            | ATGITIGGIACICAYGTNGTNTGGG     | (1)       |
|                      | 187    | Sense     | 2435-2454 <sup>a</sup> | 20            | ACIGCIGYIGARACIGGNCA          | (2)       |
|                      | VP1F   | Sense     | 2645-2669 <sup>a</sup> | 25            | GARATGGCICARATYAGRIGIAAAT     | (3)       |
|                      | VP1F78 | Sense     | 2650-2674 <sup>a</sup> | 25            | GAGATGGCCCAGATTAGAAGAAAG      | (3)       |
|                      | VP1FB  | Sense     | 2690-2712 <sup>a</sup> | 23            | TATGTIAGRRTTGTAYTCWGARTA      | (3)       |
|                      | VP1FA  | Sense     | 2766-2787 <sup>a</sup> | 22            | TW GTIATGCARTAYATGT AT GT     | (3)       |
|                      | 92379  | Antisense | 2768-2790 <sup>a</sup> | 23            | GGIGCICIGGIGGIGGNACATACAT     | (1)       |
|                      | VP1R   | Antisense | 3077-3100 <sup>a</sup> | 24            | IGCYCTIGGIGGICKICRCACCA       | (3)       |
|                      | PRPP   | Sense     | 3086-3108 <sup>a</sup> | 23            | TGGTGYCCIMGISCICIMGTGC        | (3)       |
|                      | 92383  | Antisense | 3498-3518 <sup>a</sup> | 21            | CCICCICAITCWCWGGTTTC          | (1)       |
| VP1                  | 92380  | Sense     | 2645-2669 <sup>b</sup> | 25            | GAI ATG GTICAIATYAGR AGRAAA T | (1)       |
|                      | 92580  | Sense     | 2435-2454 <sup>b</sup> | 20            | ACI GCI GYI GAR ACI GGN CA    | (2)       |
| VP1(HRV-A)           | W.F    | Sense     | 1995-2017 <sup>c</sup> | 23            | MGHTTYAGYTTYATGTTYTGTTGG      | (4)       |
|                      | X.F    | Sense     | 2430-2448 <sup>c</sup> | 19            | TRGAYGCWGCWGARACWGG           | (4)       |
|                      | X.R    | Antisense | 3333-3358 <sup>c</sup> | 26            | GTRTTTGTKCGGTADATGAYTARRTC    | (4)       |
|                      | W.R    | Antisense | 3525-3547 <sup>c</sup> | 23            | CCACARTCWCCWGGYTACADGG        | (4)       |
| VP4-VP2 <sup>d</sup> | Y.F    | Sense     | 458-478 <sup>c</sup>   | 21            | CCGGCCCCTGAATGYGGCTAA         | (4)       |
|                      | Z.F    | Sense     | 547-569 <sup>c</sup>   | 23            | ACCRACACTTTGGGTGTCCGTG        | (4)       |
|                      | Z.R    | Antisense | 1087-1109 <sup>c</sup> | 23            | TCWGGHARYTTCCAMCACCANCC       | (4)       |
|                      | Y.R    | Antisense | 1125-1149 <sup>c</sup> | 25            | ACATRTTYTSNCCAAANAYDCCCAT     | (4)       |

<sup>a</sup> The primer positions were numbered according to the complete HRV14 genome sequence (5).

<sup>b</sup> The primer positions were numbered according to HRV1B complete genome sequence (6).

<sup>c</sup> the 5' base position was numbered in accordance with the HRV-B serotype 14 genome (GenBank accession number NC\_001490).

<sup>d</sup> these primers targets both human rhinovirus (HRV) and human enterovirus (HEV).

Abbreviations for the variable nucleotide (letters) in the sequence column: "I", Inosine; "K", G or T; "R", A or G; "Y", C or T; "M", C or A; "W", A or T; "V", A or C or G; "S", G or C; "N", A or C or G or T.

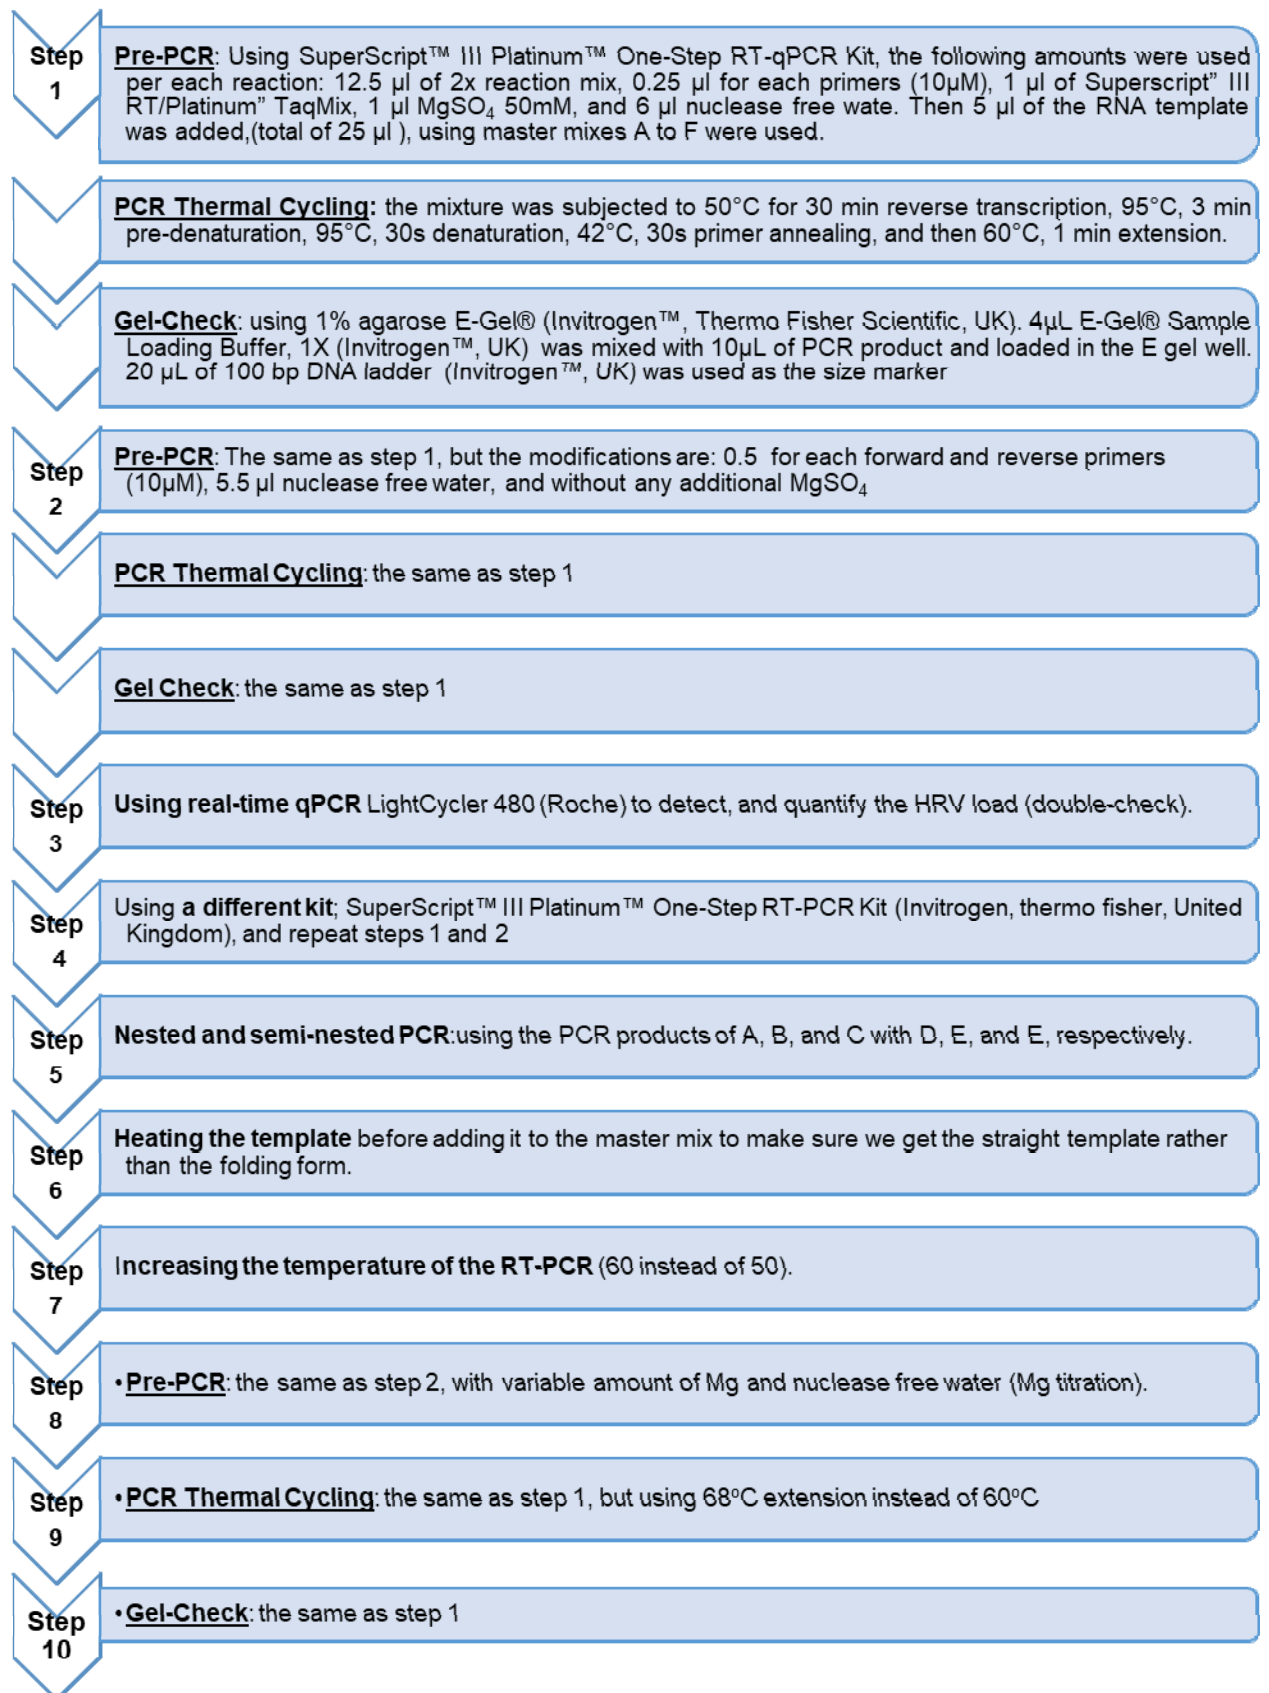

**FIGURE S1. Stage A in PCR optimisation.**

This flow chart summarises the PCR optimisation steps using DST-purified primers targeting VP3/VP1 and VP1 in the HRV region. RT-qPCR: reverse-transcriptase quantitative polymerase chain reaction; VP: viral-capsid protein.

**TABLE S2. Master mixes and primer combinations were used to detect the variable regions of the HRV genome.**

| Master mix | Primers                    | PCR product length (bp) | 1 <sup>st</sup> and/or 2 <sup>nd</sup> round PCR use(s) |
|------------|----------------------------|-------------------------|---------------------------------------------------------|
| A          | F 92378<br>R 92379         | 730                     | 1 <sup>st</sup> PCR                                     |
| B          | 92580 = F187<br>R 92383    | 1100                    | 1 <sup>st</sup> PCR                                     |
| C          | F 92380<br>R 92383         | 873                     | 1 <sup>st</sup> PCR                                     |
| C.2        | <i>F VP1F</i><br>R 92383   | 873                     | 1 <sup>st</sup> PCR                                     |
| D          | F 92580 = F 187<br>R 92379 | 355                     | 1 <sup>st</sup> PCR & 2 <sup>nd</sup> PCR               |
| E          | F VP1F<br>R VP1R           | 455                     | 1 <sup>st</sup> PCR & 2 <sup>nd</sup> PCR               |
| F          | F PRPP<br>R 92383          | 432                     | 1 <sup>st</sup> PCR                                     |
| W          | W.F<br>W.R                 | 1530                    | 1 <sup>st</sup> PCR                                     |
| X          | X.F<br>X.R                 | 929                     | 2 <sup>nd</sup> PCR                                     |
| Y          | Y.F<br>Y.R                 | 692                     | 1 <sup>st</sup> PCR                                     |
| Z          | Z.F<br>Z.R                 | 563                     | 2 <sup>nd</sup> PCR                                     |

**TABLE S3. The preparation of the first-round PCR master mixes.**

|    | Component                                                    | Amount for 1 reaction (in $\mu$ L) |
|----|--------------------------------------------------------------|------------------------------------|
| 1. | 2X Reaction Mix <sup>1</sup>                                 | 12.5                               |
| 2  | Sense primer (10 $\mu$ M)                                    | 0.5                                |
| 3  | Anti-sense primer (10 $\mu$ M)                               | 0.5                                |
| 4  | Superscript <sup>®</sup> III RT/Platinum <sup>®</sup> TaqMix | 1                                  |
| 5  | MgSO <sub>4</sub>                                            | -                                  |
| 6  | Nuclease-free water                                          | 5.5                                |
|    | <b>The total volume of master mix</b>                        | <b>20 <math>\mu</math>L</b>        |

<sup>1</sup> The Superscript III One-step RT-PCR kit contains the 2x Reaction Mix with 0.4 mM of each dNTP and 3.2 mM MgSO<sub>4</sub> as active ingredients.

**TABLE S4. The preparation of the second-round PCR reactions using the LightCycler® Multiplex DNA master mix.**

|   | <b>component</b>                          | <b>The amount for one reaction (in <math>\mu\text{L}</math>)</b> |
|---|-------------------------------------------|------------------------------------------------------------------|
| 1 | 5X Reaction Mix                           | 5                                                                |
| 2 | Sense primer (10 $\mu\text{M}$ )          | 1                                                                |
| 3 | Anti-sense primer (10 $\mu\text{M}$ )     | 1                                                                |
| 4 | Nuclease-free water                       | 17                                                               |
|   | <b>The total volume of the master mix</b> | <b>24 <math>\mu\text{L}</math></b>                               |

**TABLE S5. The preparation of the second-round PCR reactions using the Platinum® SYBR® Green qPCR SuperMix-UDG.**

|   | <b>component</b>                          | <b>The amount for one reaction (in <math>\mu\text{L}</math>)</b> |
|---|-------------------------------------------|------------------------------------------------------------------|
| 1 | Platinum® SYBR® Green qPCR SuperMix-UDG   | 12.5                                                             |
| 2 | Sense primer (10 $\mu\text{M}$ )          | 1                                                                |
| 3 | Anti-sense primer (10 $\mu\text{M}$ )     | 1                                                                |
| 4 | Nuclease-free water                       | 9.5                                                              |
|   | <b>The total volume of the master mix</b> | <b>24 <math>\mu\text{L}</math></b>                               |

**TABLE S6. Thermal Cycling conditions used in PCR reactions.**

| <b>Steps</b>         | <b>cDNA synthesis &amp; pre-denaturation</b> |       | <b>Denature</b> | <b>Anneal</b> | <b>Extend</b> | <b>Final extension (optional)</b> |
|----------------------|----------------------------------------------|-------|-----------------|---------------|---------------|-----------------------------------|
| <b>No. of cycles</b> | 1 cycle                                      |       |                 | 40 cycles     |               | 1 cycle                           |
| <b>Temperature</b>   | 45°C                                         | 95°C  | 95°C            | 42°C          | 68°C          | 68°C                              |
| <b>Time</b>          | 30 min                                       | 3 min | 30 s            | 30 s          | 1 min         | 5 min                             |

**TABLE S7. Reagents used in sequencing reactions.**

| Reagent                                      | Volume                      |
|----------------------------------------------|-----------------------------|
| Sequencing primer (1 $\mu$ M in TE 0.1M)     | 1.6 $\mu$ l                 |
| Big Dye Reaction v3.1 (ABI Part No. 4336911) | 0.16 $\mu$ l                |
| ddH <sub>2</sub> O                           | 4.84 $\mu$ l                |
| <b>Total volume of master mix</b>            | <b>8.6<math>\mu</math>l</b> |
| PCR product                                  | 1.4 $\mu$ l                 |

**TABLE S8. Cycling conditions used in sequencing reactions.**

| Number of cycles        | Temperature | Time  |
|-------------------------|-------------|-------|
| 1                       | 96°C        | 20s   |
| 25                      | 96°C        | 10s   |
|                         | 50°C        | 5s    |
|                         | 60°C        | 4 min |
| 4°C soak until required |             |       |

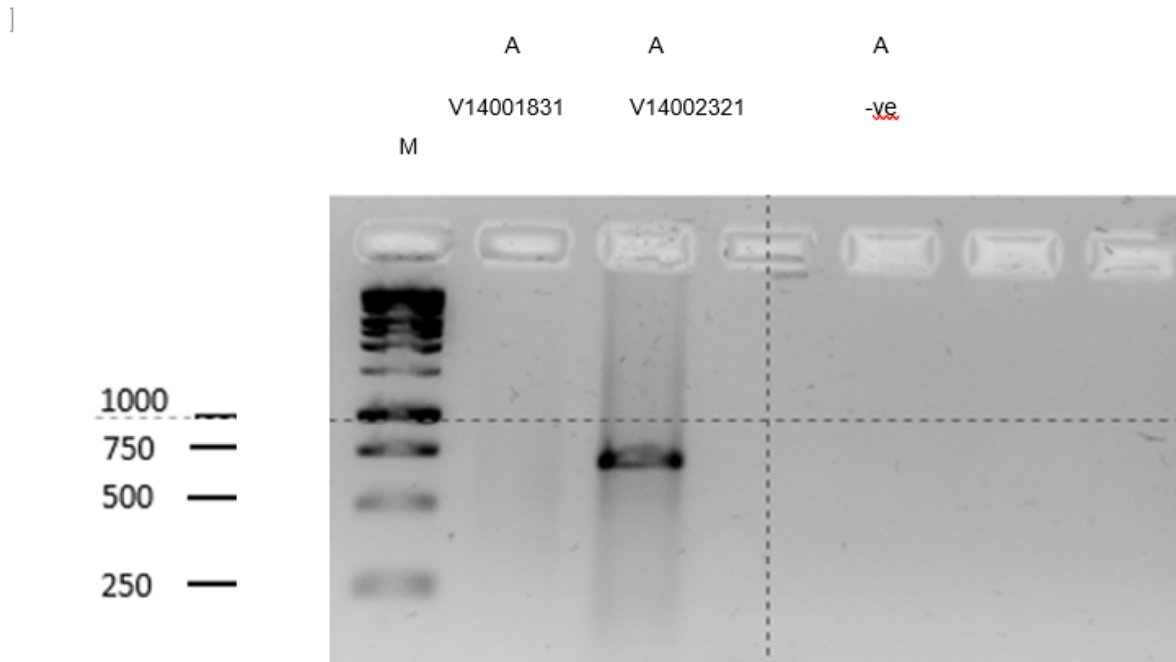

**FIGURE S2. PCR product representation of master mix A.**

This gel picture is showing a single, brighter product band on the 1 % agarose gel, of the right size (~730 bp) with the sample V14002321, but not with sample V14001831 although both samples have almost the same HRV load (the same  $C_t$  value), and this reflects the high variation in the targeted region between HRV species. The “A” assay (master mix) is targeting a highly variable region of VP3/VP1 in HRV. GeneRuler 1 kb DNA Ladder (Thermo Scientific, UK) was used.

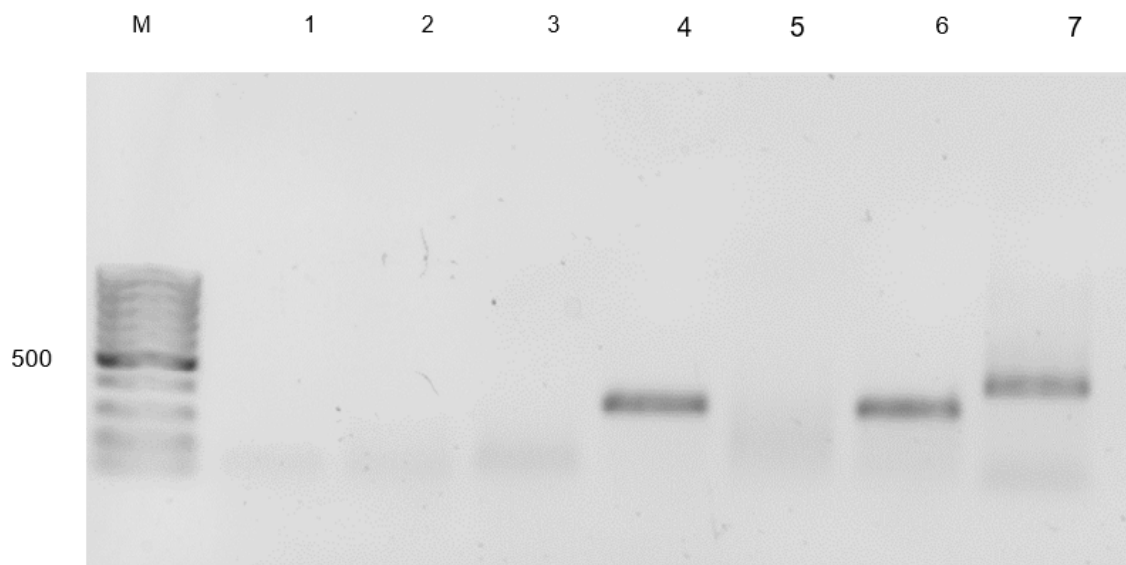

**FIGURE S3. The second-round PCR product representation of A:D and C:E assays.**

Using 1% agarose gel, this figure showing a product of ~355 bp, and ~455 bp for A:D and C:E assays, respectively. the Platinum® SYBR® Green qPCR SuperMix-UDG (Thermo Fisher, cat. no. 11733038) was used to prepare D and E master mixes. M: GeneRuler™ 100 bp DNA Ladder (marker) (Thermo Scientific, UK), Lane 1: A:D with V14000746 specimen, Lane 2: A:D with V14001545 specimen, Lane 3: A:D with V14001831 specimen, Lane 4: A:D with V14002321

specimen, Lane 5 is a replicate of lane 3 (both gave no product), Lane 6 is a replicate for lane 4 (both gave the same positive product with the same length), Lane 7: C:E with V14002321 specimen.

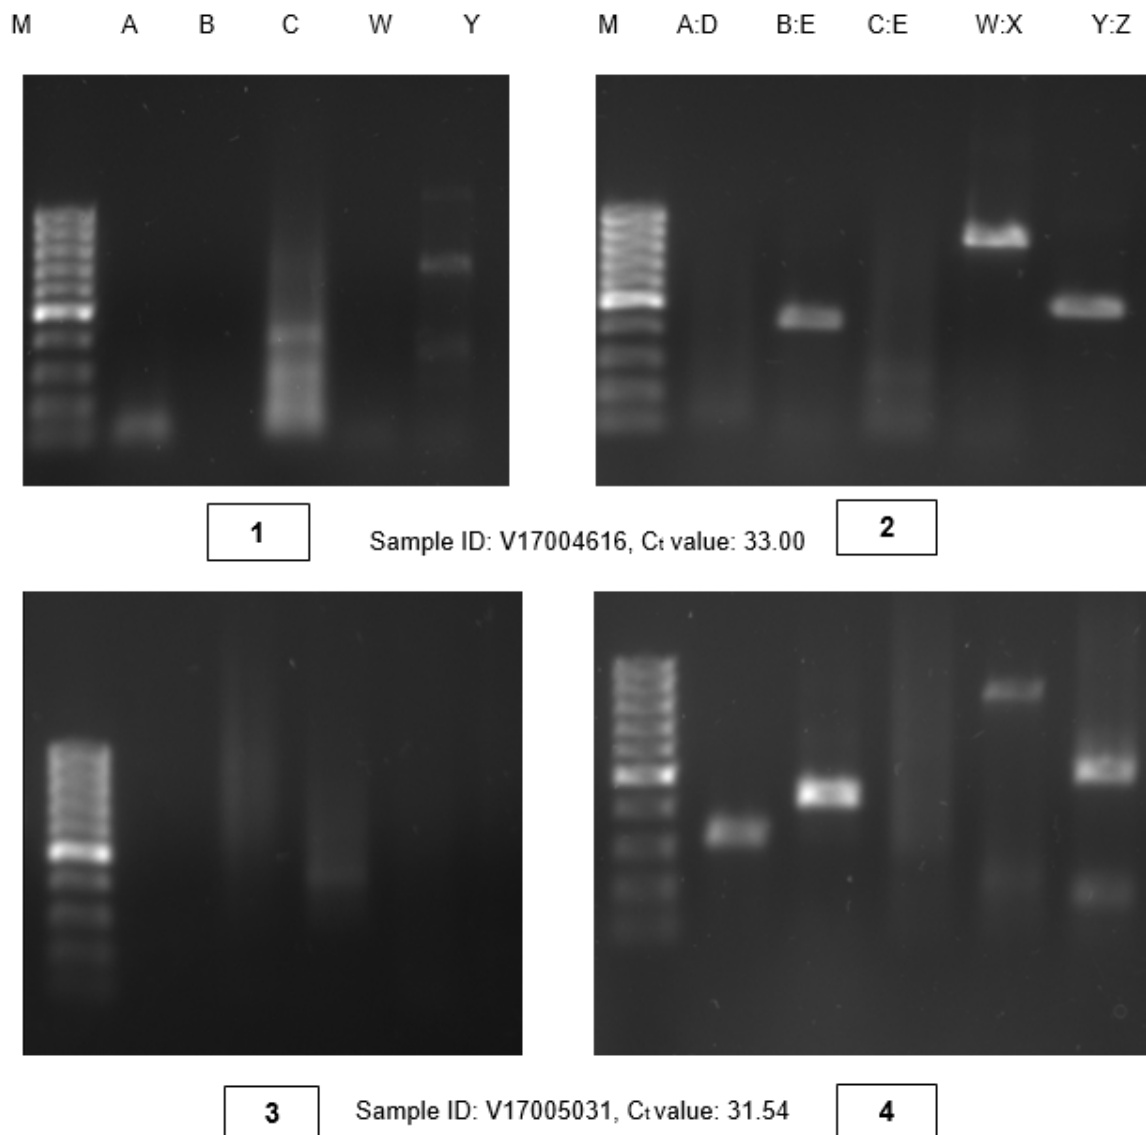

**FIGURE S4. Gel electrophoresis of first-round and second-round PCR products of 10 different assays.**

The representative 1 % agarose gel pictures show PCR amplification products for 5 different first-round assays (pictures 1 and 3) and 5 related second-round PCR assays (pictures 2 and 4) for two different specimens with the corresponding HRV  $C_t$  value. Figures 2 and 4 show a product of ~455 bp, ~929 bp, and ~563 bp for B:E, W:X, and Y:Z assays, respectively for the two different respiratory samples, in addition to ~355 bp for A:D assay for the second sample (picture 4). M, GeneRuler™ 100 bp DNA marker.

**TABLE S9. The PCR product positivity rate of HRV-VP assays using the fifteen respiratory samples.**

| <b>Assay</b> | <b>Assay's target</b> | <b>Positivity rate</b> |
|--------------|-----------------------|------------------------|
| <b>A</b>     | VP3/VP1               | 6/15 (40 %)            |
| <b>B</b>     | VP1                   | 1/15 (7 %)             |
| <b>C</b>     | VP1                   | 2/15 (13 %)            |
| <b>W</b>     | VP1                   | 0/15 (0 %)             |
| <b>Y</b>     | VP4/VP2               | 8/15 (53 %)            |
| <b>A:D</b>   | VP1                   | 6/15 (40 %)            |
| <b>B:E</b>   | VP1                   | 5/15 (33 %)            |
| <b>C:E</b>   | VP1                   | 3/15 (20 %)            |
| <b>W:X</b>   | VP1                   | 4/15 (27 %)            |
| <b>Y:Z</b>   | VP4/VP2               | 13/15 (87 %)           |

**TABLE S10. The successful representation of the Sanger sequencing primers.**

| <b>Primer</b> | <b>Primer Failure No.</b> | <b>Total reactions</b> |
|---------------|---------------------------|------------------------|
| F92378        | 0                         | 6                      |
| R92379        | 7                         | 25                     |
| F92580        | 4                         | 13                     |
| Y.F           | 0                         | 7                      |
| Y.R           | 0                         | 7                      |
| F VP1F        | 0                         | 6                      |
| VP1R          | 1                         | 6                      |
| X.F           | 3                         | 6                      |
| X.R           | 2                         | 6                      |
| Z.F           | 5                         | 22                     |
| Z.R           | 2                         | 15                     |
| Total         | 24                        | 119                    |



**TABLE S11. A summary of gel-check, sequencing successful, and sequences assembly results of the clinical HRV tested samples.**

| Specimen ID | C <sub>t</sub><br>value | PCR product on gel (+, -) |   |     |     |     |     | Total successful<br>seq. ratio | Contigs no. |          | Contig<br>length* | No. of seq. | No. (top, bottom) | Avg<br>Coverage |
|-------------|-------------------------|---------------------------|---|-----|-----|-----|-----|--------------------------------|-------------|----------|-------------------|-------------|-------------------|-----------------|
|             |                         | A                         | Y | A:D | B:E | W:X | Y:Z |                                |             |          |                   |             |                   |                 |
| V14002321   | 18.06                   | +                         | + | +   | +   | -   | +   | 14/16                          | 2           | Contig 1 | 671               | 4           | (2,2)             | 2.93            |
|             |                         |                           |   |     |     |     |     |                                |             | Contig 2 | 686               | 5           | (3,2)             | 2.22            |
| V14001831   | 18.10                   | -                         | + | +   | +   | -   | +   | 7/7                            | 1           | Contig 1 | 618               | 5           | (3,2)             | 3.06            |
| V14001545   | 19.08                   | +                         | + | -   | -   | -   | +   | 6/8                            | 1           | Contig 1 | 643               | 4           | (2,2)             | 2.83            |
| V14000746   | 19.12                   | +                         | - | +   | +   | -   | +   | 11/16                          | 3           | Contig 1 | 465               | 3           | (1,2)             | 2.01            |
|             |                         |                           |   |     |     |     |     |                                |             | Contig 2 | 703               | 4           | (2,2)             | 2.26            |
|             |                         |                           |   |     |     |     |     |                                |             | Contig 3 | 574               | 3           | (1,2)             | 2.46            |
| V17004616   | 33.00                   | -                         | + | -   | +   | +   | +   | 9/12                           | 1           | Contig 1 | 62                | 2           | (1,1)             | 1.76            |
| V17004470   | 31.10                   | -                         | - | -   | -   | +   | +   | 3/5                            | 0           | -        | -                 | -           | -                 | -               |
| V17005728   | 26.69                   | +                         | + | +   | -   | +   | +   | 12/13                          | 2           | Contig 1 | 634               | 2           | (1,1)             | 1.49            |
|             |                         |                           |   |     |     |     |     |                                |             | Contig 2 | 600               | 5           | (3,2)             | 2.95            |
| V17006129   | 31.90                   | +                         | + | -   | -   | -   | +   | 4/5                            | 1           | Contig 1 | 665               | 2           | (1,1)             | 1.91            |
| V17006131   | 29.91                   | +                         | - | -   | -   | -   | -   | 6/10                           | 0           | -        | -                 | -           | -                 | -               |
| V17006286   | 33.07                   | -                         | + | +   | -   | -   | +   | 3/3                            | 0           | -        | -                 | -           | -                 | -               |
| V17004189   | 28.88                   | -                         | - | +   | -   | -   | +   | 2/3                            | 0           | -        | -                 | -           | -                 | -               |
| V17003665   | 30.09                   | -                         | - | -   | -   | -   | +   | 2/2                            | 0           | -        | -                 | -           | -                 | -               |
| V17004870   | 21.09                   | -                         | + | -   | -   | -   | -   | 4/7                            | 1           | Contig 1 | 229               | 2           | (1,1)             | 1.53            |
| V17005031   | 31.54                   | -                         | - | +   | +   | +   | +   | 5/8                            | 0           | -        | -                 | -           | -                 | -               |
| V17004381   | 28.75                   | -                         | - | -   | -   | -   | +   | 2/2                            | 0           | -        | -                 | -           | -                 | -               |

\*All without gaps

Pro Assembly algorithm parameters used for contigs assembly using SeqMan Pro (DNASTAR Lasergene version 15) are as the following: match size = 25, minimum match percentage = 70, minimum sequence length = 50, gap penalty = 0.00, gap length penalty = 0.00, match spacing = 150, maximum mismatch end bases = 15.

**TABLE S12. Description of the VP regions' sequences assembly.**

| No.                     | Reaction name          | Pre-trim length | Trimmed length   | Sequence range | Contig   | Average quality |
|-------------------------|------------------------|-----------------|------------------|----------------|----------|-----------------|
| <b>Sample V14002321</b> |                        |                 |                  |                |          |                 |
| 1.                      | 11-V14002321-Y_ZF      | 647             | 541              | (1>541)        | Contig 1 | 30              |
| 2.                      | 20-V14002321-AD_F92580 | 283             | 34               | (24>57)        | -        | 55              |
| 3.                      | 20-V14002321-AD_R92379 | 326             | 68               | (1>68)         | Contig 2 | 19              |
| 4.                      | 32-V14002321-WX_R92379 | 144             | 72               | (16>87)        | Contig 2 | 18              |
| 5.                      | 45-V14002321-YZ_ZF     | 320             | 39               | (28>66)        | Contig 1 | 14              |
| 6.                      | 45-V14002321-YZ        | 473             | 153              | (1>153)        | Contig 1 | 26              |
| 7.                      | V14002321-A_F92580     | 326             | 67               | (3>69)         | Contig 2 | 23              |
| 8.                      | 4-V14002321-A_F92378   | 694             | 682              | (1>682)        | Contig 2 | 27              |
| 9.                      | 4-V14002321-A_R92379   | 698             | 603              | (1>603)        | -        | 35              |
| 10.                     | 11-V14002321-Y_YF      | 895             | 624              | (1>624)        | -        | 32              |
| 11.                     | 11-V14002321-Y_YR      | 638             | 629              | (4>632)        | Contig 1 | 38              |
| 12.                     | 32-V14002321-WX_XR     | 203             | 26               | (22>47)        | -        | 23              |
| 13.                     | 25-V14002321-BE_FVP1F  | 386             | 75               | (34>108)       | -        | 14              |
| 14.                     | 25-V14002321-BE_VP1R   | 411             | 92               | (38>129)       | -        | 12              |
| <b>Average</b>          |                        | <b>460</b>      | <b>265 (57%)</b> |                |          | <b>27</b>       |
| <b>Sample V14001831</b> |                        |                 |                  |                |          |                 |
| 1.                      | 12-V14001831-Y_ZF      | 670             | 502              | (1>502)        | Contig 1 | 28              |
| 2.                      | 26-V14001831-BE_FVP1F  | 427             | 160              | (23>182)       | -        | 17              |
| 3.                      | 26-V14001831-BE_R92379 | 426             | 219              | (33>251)       | -        | 10              |
| 4.                      | 46-V14001831-YZ_ZF     | 280             | 57               | (30>86)        | Contig 1 | 38              |
| 5.                      | 46-V14001831-YZ_ZR     | 436             | 108              | (1>108)        | Contig 1 | 27              |
| 6.                      | 12-V14001831-Y_YF      | 722             | 598              | (1>598)        | Contig 1 | 21              |
| 7.                      | 12-V14001831-Y_YR      | 682             | 610              | (2>611)        | Contig 1 | 26              |
| <b>Average</b>          |                        | <b>520</b>      | <b>322 (62%)</b> |                |          | <b>24</b>       |
| <b>Sample V14001545</b> |                        |                 |                  |                |          |                 |
| 1.                      | 13-V14001545-Y_YF      | 794             | 610              | (1>610)        | Contig 1 | 30              |
| 2.                      | 13-V14001545-Y_YR      | 631             | 618              | (1>618)        | Contig 1 | 38              |
| 3.                      | 13-V14001545-Y_ZF      | 544             | 500              | (1>500)        | Contig 1 | 26              |
| 4.                      | 47-V14001545-YZ_ZR     | 398             | 72               | (11>82)        | Contig 1 | 22              |
| 5.                      | 5-V14001545-A_F92378   | 408             | 286              | (32>317)       | -        | 17              |
| 6.                      | 5-V14001545-A_R92379   | 362             | 332              | (31>362)       | -        | 16              |
| <b>Average</b>          |                        | <b>523</b>      | <b>403 (77%)</b> |                |          | <b>25</b>       |
| <b>Sample V14000746</b> |                        |                 |                  |                |          |                 |
| 1.                      | 14-V14000746-Y_YF      | 1000            | 548              | (23>570)       | Contig 3 | 30              |
| 2.                      | 14-V14000746-Y_YR      | 641             | 493              | (12>504)       | Contig 3 | 25              |
| 3.                      | 14-V14000746-Y_ZF      | 754             | 360              | (1>360)        | Contig 3 | 30              |
| 4.                      | 21-V14000746-AD_F92580 | 463             | 321              | (1>321)        | Contig 2 | 47              |
| 5.                      | 21-V14000746-AD_R92379 | 516             | 315              | (2>316)        | Contig 2 | 40              |
| 6.                      | 27-V14000746-BE_FVP1F  | 907             | 417              | (3>419)        | Contig 1 | 39              |
| 7.                      | 27-V14000746-BE_VP1R   | 628             | 418              | (1>418)        | Contig 1 | 37              |
| 8.                      | 48-V14000746-YZ_ZR     | 276             | 68               | (1>68)         | -        | 16              |
| 9.                      | V14000746-BE_R92379    | 424             | 93               | (22>114)       | Contig 1 | 25              |
| 10.                     | 6-V14000746-A_F92378   | 696             | 673              | (2>674)        | Contig 2 | 26              |
| 11.                     | 6-V14000746-A_R92379   | 673             | 267              | (26>292)       | Contig 2 | 26              |
| <b>Average</b>          |                        | <b>634</b>      | <b>361 (57%)</b> |                |          | <b>31</b>       |
| <b>Sample V17004616</b> |                        |                 |                  |                |          |                 |
| 1.                      | 7-V17004616-Y_ZF       | 694             | 524              | (36>559)       | -        | 24              |
| 2.                      | 22-V17004616-BE_R92379 | 438             | 394              | (22>415)       | -        | 15              |
| 3.                      | 22-V17004616-BE_VP1R   | 239             | 48               | (20>67)        | -        | 10              |
| 4.                      | 28-V17004616-WX_R92379 | 131             | 52               | (20>71)        | Contig 1 | 14              |
| 5.                      | 28-V17004616-WX_XF     | 245             | 17               | (25>41)        | -        | 15              |
| 6.                      | 34-V17004616-YZ_ZR     | 189             | 64               | (1>64)         | -        | 29              |
| 7.                      | 7-V17004616-Y_YF       | 316             | 41               | (27>67)        | -        | 10              |
| 8.                      | 7-V17004616-Y_YR       | 665             | 116              | (23>138)       | -        | 63              |
| 9.                      | 22-V17004616-BE_FVP1F  | 353             | 53               | (20>72)        | Contig 1 | 18              |
| <b>Average</b>          |                        | <b>363</b>      | <b>146 (40%)</b> |                |          | <b>22</b>       |
| <b>Sample V17004470</b> |                        |                 |                  |                |          |                 |
| 1.                      | 29-V17004470-WX_XR     | 135             | 9                | (42>50)        | -        | 23              |
| 2.                      | 35-V17004470-YZ_ZR     | 154             | 69               | (1>69)         | -        | 26              |
| 3.                      | 29-V17004470-WX_XF     | 211             | 81               | (15>95)        | -        | 17              |
| <b>Average</b>          |                        | <b>167</b>      | <b>53 (32%)</b>  |                |          | <b>22</b>       |
| <b>Sample V17005728</b> |                        |                 |                  |                |          |                 |

|                         |                        |            |                  |           |          |           |
|-------------------------|------------------------|------------|------------------|-----------|----------|-----------|
| 1.                      | 8-V17005728-Y_YF       | 882        | 595              | (1>595)   | Contig 2 | 29        |
| 2.                      | 8-V17005728-Y_YR       | 840        | 508              | (1>508)   | Contig 2 | 23        |
| 3.                      | 8-V17005728-Y_ZF       | 499        | 487              | (2>488)   | Contig 2 | 26        |
| 4.                      | 15-V17005728-AD_R92379 | 287        | 59               | (13>71)   | -        | 13        |
| 5.                      | 30-V17005728-WX_R92379 | 169        | 68               | (20>87)   | -        | 27        |
| 6.                      | 36_V17005728-YZ_ZF     | 315        | 75               | (21>95)   | Contig 2 | 16        |
| 7.                      | 36-V17005728-YZ_ZR     | 235        | 84               | (5>88)    | Contig 2 | 18        |
| 8.                      | 1-V17005728-A_F92378   | 645        | 632              | (1>632)   | Contig 1 | 32        |
| 9.                      | 1-V17005728-A_R92379   | 687        | 307              | (2>308)   | Contig 1 | 27        |
| 10.                     | V17005728-A_F92580     | 586        | 336              | (111>446) | -        | 14        |
| 11.                     | 30-V17005728-WX_XF     | 167        | 54               | (25>78)   | -        | 15        |
| 12.                     | 30-V17005728-WX_XR     | 346        | 57               | (25>81)   | -        | 24        |
| <b>Average</b>          |                        | <b>472</b> | <b>272 (58%)</b> |           |          | <b>22</b> |
| <b>Sample V17006129</b> |                        |            |                  |           |          |           |
| 1.                      | 2-V17006129-A_R92379   | 634        | 634              | (1>634)   | Contig 1 | 32        |
| 2.                      | 37-V17006129-YZ_ZR     | 291        | 115              | (3>117)   | -        | 23        |
| 3.                      | 2-V17006129-A_F92378   | 637        | 626              | (1>626)   | Contig 1 | 30        |
| 4.                      | 2-V17006129-A_F92580   | 290        | 183              | (7>189)   | -        | 15        |
| <b>Average</b>          |                        | <b>463</b> | <b>390 (85%)</b> |           |          | <b>25</b> |
| <b>Sample V17006131</b> |                        |            |                  |           |          |           |
| 1.                      | 3-V17006131-A_F92580   | 163        | 136              | (28>163)  | -        | 17        |
| 2.                      | 9-V17006131-Y_YF       | 704        | 265              | (19>283)  | -        | 29        |
| 3..                     | 9-V17006131-Y_YR       | 661        | 157              | (17>173)  | -        | 18        |
| 4.                      | 9-V17006131-Y_ZF       | 519        | 466              | (1>466)   | -        | 28        |
| 5.                      | 3-V17006131-A_F92378   | 640        | 286              | (162>447) | -        | 17        |
| 6.                      | 16-V17006131-AD_F92580 | 245        | 25               | (28>52)   | -        | 33        |
| <b>Average</b>          |                        | <b>489</b> | <b>223 (46%)</b> |           |          | <b>24</b> |
| <b>Sample V17006286</b> |                        |            |                  |           |          |           |
| 1.                      | 39-V17006286-YZ_ZF     | 213        | 8                | (32>39)   | -        | 73        |
| 2.                      | 17-V17006286-AD_F92580 | 153        | 19               | (15>33)   | -        | 17        |
| 3.                      | 17-V17006286-AD_R92379 | 156        | 47               | (4>50)    | -        | 15        |
| <b>Average</b>          |                        | <b>174</b> | <b>25 (14%)</b>  |           |          | <b>35</b> |
| <b>Sample V17004189</b> |                        |            |                  |           |          |           |
| 1.                      | 40-V17004189-YZ_ZR     | 20         | 20               | (61>80)   | -        | 9         |
| 2.                      | 18-V17004189-AD_R92379 | 46         | 46               | (25>70)   | -        | 28        |
| <b>Average</b>          |                        | <b>33</b>  | <b>33 (100%)</b> |           |          | <b>19</b> |
| <b>Sample V17003665</b> |                        |            |                  |           |          |           |
| 1.                      | 41-V17003665-YZ_ZF     | 159        | 8                | (17>24)   | -        | 21        |
| 2.                      | 41-V17003665-YZ_ZR     | 148        | 45               | (25>69)   | -        | 10        |
| <b>Average</b>          |                        | <b>154</b> | <b>27 (18%)</b>  |           |          | <b>16</b> |
| <b>Sample V17004870</b> |                        |            |                  |           |          |           |
| 1.                      | 10-V17004870-Y_YR      | 320        | 176              | (7>182)   | Contig 1 | 31        |
| 2.                      | 10-V17004870-Y_ZF      | 285        | 208              | (17>224)  | -        | 15        |
| 3.                      | 10-V17004870-Y_YF      | 291        | 168              | (19>186)  | Contig 1 | 15        |
| 4.                      | 23-V17004870-BE_FVP1F  | 139        | 52               | (34>85)   | -        | 12        |
| <b>Average</b>          |                        | <b>259</b> | <b>151 (59%)</b> |           |          | <b>19</b> |
| <b>Sample V17005031</b> |                        |            |                  |           |          |           |
| 1.                      | 24-V17005031-BE_FVP1F  | 243        | 47               | (25>71)   |          | 27        |
| 2.                      | 24-V17005031-BE_R92379 | 167        | 74               | (94>167)  |          | 10        |
| 3.                      | 24-V17005031-BE_VP1R   | 310        | 61               | (20>80)   |          | 10        |
| 4.                      | 43-V17005031-YZ_ZR     | 198        | 59               | (1>59)    |          | 14        |
| 5.                      | 19-V17005031-AD_F92580 | 159        | 57               | (5>61)    |          | 15        |
| <b>Average</b>          |                        | <b>215</b> | <b>60 (28%)</b>  |           |          | <b>16</b> |
| <b>Sample V17004381</b> |                        |            |                  |           |          |           |
| 1.                      | 44-V17004381-YZ_ZF     | 139        | 31               | (45>75)   | -        | 42        |
| 2.                      | 44-V17004381-YZ_ZR     | 246        | 99               | (6>104)   | -        | 21        |
| <b>Average</b>          |                        | <b>193</b> | <b>65</b>        |           |          | <b>32</b> |

Trim ends parameters used: trace threshold = 8, quality threshold = 10, non-trace window size = 30.

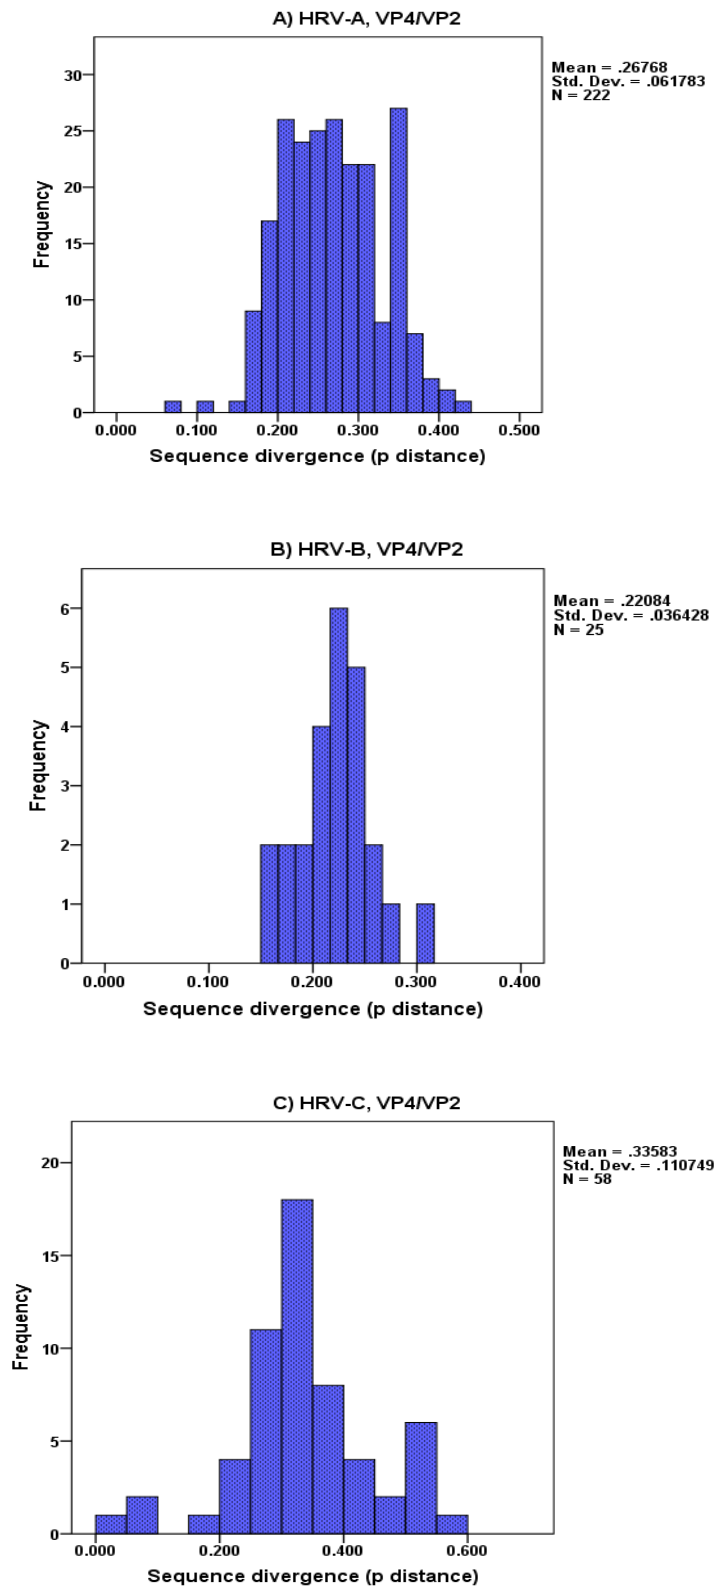

**FIGURE S5.** Distribution of nucleotide p-distances for HRV-A (A), HRV-B (B), and HRV-C (C) detected in the study compared with sequences from reference strains based on the nucleotide sequences of the VP4/VP2 region.

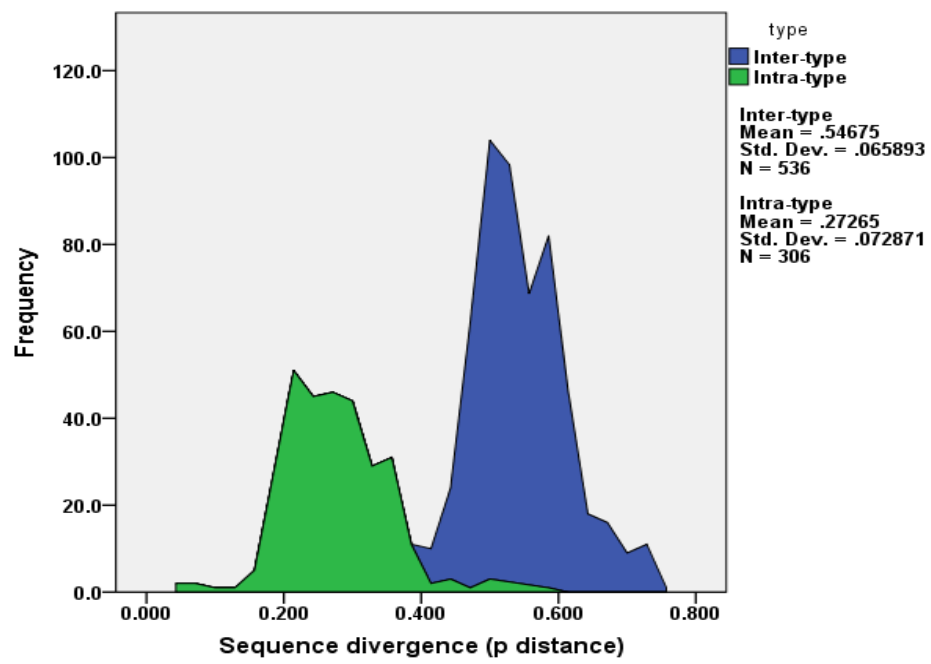

**FIGURE S6.** Distribution of pairwise nucleotide p-distances for the VP4/VP2 region of all HRV sequences.

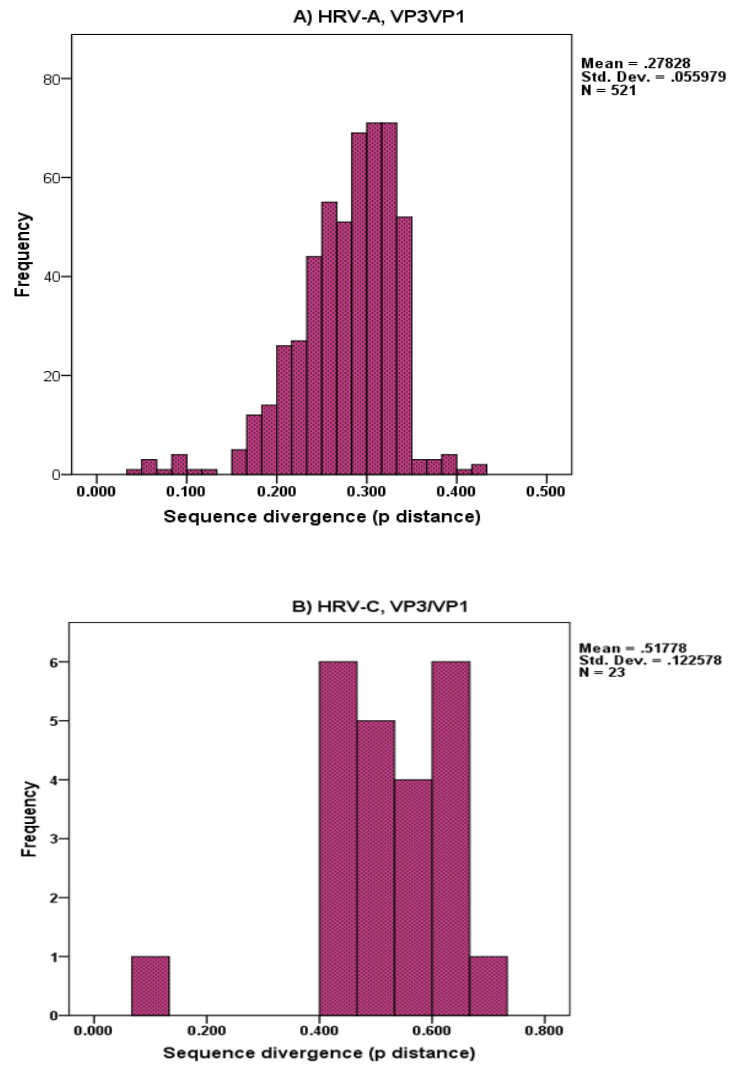

**FIGURE S7. Distribution of nucleotide p-distances for HRV-A (A), and HRV-C (B) detected in the study compared with sequences from reference strains based on the nucleotide sequences of the VP3/VP1 region.**

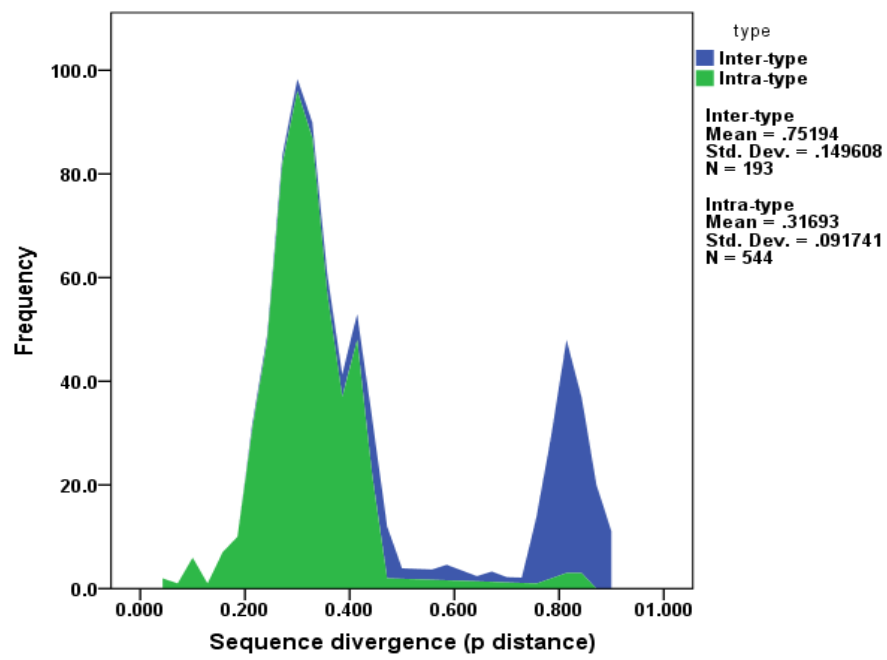

**FIGURE S8.** Distribution of pairwise nucleotide p-distances for the VP3/VP1 region of all HRV sequences.

**TABLE S13. The multiple sequence alignments (MSAs) data and genotype identification.**

| MSA no. | VP region | MSA length (bps) | Samples               | Genotype | Bootstrap | Distance |
|---------|-----------|------------------|-----------------------|----------|-----------|----------|
| MSA 1   | VP4/VP2   | 512              | V14001831_Contig_1    | HRV-C_32 | 100       | 0.047    |
|         |           |                  | V17005728_Contig_2    | HRV-C_45 | 73        | 0.289    |
| MSA 2   | VP4/VP2   | 545              | V14002321_Contig_1    | HRV-A_21 | 100       | 0.065    |
|         |           |                  | V14001831_Contig_1    | HRV-C_32 | 100       | 0.052    |
|         |           |                  | V14001545_Contig_1    | HRV-B_79 | 55        | 0.150    |
|         |           |                  | V14000746_Contig_3    | HRV-A_1  | N         | 0.196    |
| MSA 3   | VP4/VP2   | 142              | R_41-V17003665-YZ_ZR  | HRV-C_24 | 69        | 0.268    |
| MSA 4   | VP4/VP2   | 427              | V17006131-Y_ZF        | HRV-C_45 | N         | 0.296    |
|         |           |                  | V17004870-Y_ZF        | HRV-C_32 | N         | 0.927    |
| MSA 5   | VP4/VP2   | 310              | V14002321-YZ_ZF       | HRV-A_21 | 95        | 0.104    |
|         |           |                  | V17006286-YZ_ZF       | HRV-A_50 | 50        | 0.264    |
| MSA 6   | VP4/VP2   | 177              | R_V17004616-YZ_ZR     | HRV-A_98 | N         | 0.173    |
|         |           |                  | R_V14000746-YZ_ZR     | HRV-A_1  | N         | 0.211    |
|         |           |                  | R_V17004470-YZ_ZR     | HRV-A_13 | N         | 0.236    |
| MSA 7   | VP4/VP2   | 189              | R_V17006129-YZ_ZR     | HRV-C_3  | 79        | 0.181    |
|         |           |                  | R_V17004381-YZ_ZR     | HRV-C_36 | 100       | 0.066    |
| MSA 8   | VP4/VP2   | 170              | V17004870-Y_ZF        | HRV-C    | 99        | 0.476    |
| MSA 9   | VP3/VP1   | 478              | V14002321_Contig_2    | HRV-A_21 | 99        | 0.096    |
|         |           |                  | V14000746_Contig_2    | HRV-A_40 | 99        | 0.089    |
|         |           |                  | 17005728_Contig_1     | HRV-C_7  | 99        | 0.506    |
|         |           |                  | V17006129_Contig_1    | HRV-C_7  | 99        | 0.098    |
| MSA 10  | VP3/VP1   | 335              | V14002321_Contig_2    | HRV-A_21 | 97        | 0.046    |
|         |           |                  | V14002321-AD_F92580   | HRV-A_45 | 86        | 1.883    |
|         |           |                  | V14000746_Contig_2    | HRV-A_40 | 96        | 0.055    |
|         |           |                  | V17005031-AD_F92580   | HRV-C_7  | 86        | 2.191    |
| MSA 11  | VP3/VP1   | 81               | V14002321-AD_F92580   | HRV-A_21 | 80        | 0.120    |
|         |           |                  | V17005031-AD_F92580   | HRV-A_47 | 52        | 0.087    |
| MSA 12  | VP3/VP1   | 104              | R_V14001545_A_R92379  | HRV-A_40 | 63        | 0.112    |
|         |           |                  | R_V17005728-WX_R92379 | HRV-A_78 | 83        | 0.133    |
| MSA 13  | VP3/VP1   | 101              | V14002321_Contig_2    | HRV-A_21 | 99        | 0.053    |
|         |           |                  | R_V17005728-WX_R92379 | HRV-A_78 | 82        | 0.133    |
| MSA 14  | VP3/VP1   | 261              | V14002321_Contig_2    | HRV-A_21 | 99        | 0.072    |
|         |           |                  | V17004616-WX_XF       | HRV-A_59 | 58        | 0.208    |
|         |           |                  | V17004470-WX_XF       | HRV-A_41 | N         | 0.634    |
| MSA 15  | VP3/VP1   | 364              | V14002321_Contig_2    | HRV-A_21 | 100       | 0.059    |
|         |           |                  | R_V14001545_A_R92379  | HRV-A_21 | 100       | 0.179    |
| MSA 16  | VP3/VP1   | 410              | V14000746_Contig_1    | HRV-A_21 | 99        | 0.114    |
|         |           |                  | R_V14001831_BE_R92379 | HRV-A_21 | 99        | 0.118    |

MSA: Multiple Sequence Alignment, N: not significant bootstrap (< 50%).



**TABLE S14. A summary of recombination events detected in the multiple sequence alignments.**

| MSA no. | Overall Rec. no. | Study Sample       | Major Parent | Minor Parent | R                     | B                     | M                     | C                     | S                     | T                     |
|---------|------------------|--------------------|--------------|--------------|-----------------------|-----------------------|-----------------------|-----------------------|-----------------------|-----------------------|
| MSA 1   | 6                | -                  | -            | -            | -                     | -                     | -                     | -                     | -                     | -                     |
| MSA 2   | 6                | V14000746_Contig_3 | A_11         | B_37         | $2.18 \times 10^{-7}$ | $1.30 \times 10^{-2}$ | $1.16 \times 10^{-3}$ | $1.71 \times 10^{-4}$ | $7.08 \times 10^{-3}$ | $7.91 \times 10^{-4}$ |
| MSA 3   | -                | -                  | -            | -            | -                     | -                     | -                     | -                     | -                     | -                     |
| MSA 4   | 1                | -                  | -            | -            | -                     | -                     | -                     | -                     | -                     | -                     |
| MSA 5   | 2                | V17006286-YZ_ZF    | A_50         | Unknown      | $1.64 \times 10^{-3}$ | -                     | -                     | -                     | -                     | $1.24 \times 10^{-3}$ |
| MSA 6   | 1                | R_V17004470-YZ_ZR  | Unknown      | A_19         | $3.80 \times 10^{-2}$ | -                     | -                     | -                     | -                     | -                     |
| MSA 7   | -                | -                  | -            | -            | -                     | -                     | -                     | -                     | -                     | -                     |
| MSA 8   | -                | -                  | -            | -            | -                     | -                     | -                     | -                     | -                     | -                     |
| MSA 9   | 1                | -                  | -            | -            | -                     | -                     | -                     | -                     | -                     | -                     |
| MSA 10  | 1                | -                  | -            | -            | -                     | -                     | -                     | -                     | -                     | -                     |
| MSA 11  | -                | -                  | -            | -            | -                     | -                     | -                     | -                     | -                     | -                     |
| MSA 12  | -                | -                  | -            | -            | -                     | -                     | -                     | -                     | -                     | -                     |
| MSA 13  | -                | -                  | -            | -            | -                     | -                     | -                     | -                     | -                     | -                     |
| MSA 14  | 1                | V17004616-WX_XF    | A_100        | Unknown      | $1.71 \times 10^{-2}$ | -                     | $4.93 \times 10^{-2}$ | -                     | -                     | $2.88 \times 10^{-2}$ |
| MSA 15  | -                | -                  | -            | -            | -                     | -                     | -                     | -                     | -                     | -                     |
| MSA 16  | -                | -                  | -            | -            | -                     | -                     | -                     | -                     | -                     | -                     |

The recombination detection programmes used: RDP (R), Bootscan (B), Maximum X2 (M), Chimaera (C), SiScan (S) and 3Seq (T).

The recombination events were assessed by the average p values of recombination events with  $<1.00 \times 10^{-5}$  considered significant. None of the recombinant sequences was detected by more than two programmes with the average p values of recombination events of  $< 1.00 \times 10^{-5}$ .

**Abbreviations:** MSA: multiple sequence alignment; Rec: recombination.

## **References**

1. Vlasak M, Blomqvist S, Hovi T, Hewat E, Blaas D. Sequence and structure of human rhinoviruses reveal the basis of receptor discrimination. *Journal of virology*. 2003;77(12):6923-30.
2. Oberste MS, Maher K, Flemister MR, Marchetti G, Kilpatrick DR, Pallansch MA. Comparison of classic and molecular approaches for the identification of untypeable enteroviruses. *Journal of clinical microbiology*. 2000;38(3):1170-4.
3. Laine P, Savolainen C, Blomqvist S, Hovi T. Phylogenetic analysis of human rhinovirus capsid protein VP1 and 2A protease coding sequences confirms shared genus-like relationships with human enteroviruses. *Journal of general virology*. 2005;86(3):697-706.
4. Wisdom A, Leitch EM, Gaunt E, Harvala H, Simmonds P. Screening respiratory samples for detection of human rhinoviruses (HRVs) and enteroviruses: comprehensive VP4-VP2 typing reveals high incidence and genetic diversity of HRV species C. *Journal of clinical microbiology*. 2009;47(12):3958-67.
5. Lee W-M, Monroe S, Rueckert R. Role of maturation cleavage in infectivity of picornaviruses: activation of an infectosome. *Journal of virology*. 1993;67(4):2110-22.

6. Hughes PJ, North C, Jellis CH, Minor PD, Stanway G. The nucleotide sequence of human rhinovirus 1B: molecular relationships within the rhinovirus genus. *Journal of general virology*. 1988;69(1):49-58.
